# Supplementary material for: Review: Organic nanoparticle based active targeting for photodynamic therapy treatment of breast cancer cells
Source: PubMed Central journal article supplement (PMC7275783; doi:10.18632/oncotarget.27596), 2020-06-02
Supplement: oncotarget-11-2120-s002.pdf [file oncotarget-11-2120-s002.pdf]

**Supplementary Table 1: Chemical structures and absorption wavelengths of various photosensitizers utilized for active targeted PDT treatment of breast cancer**

| Type of PS  | PS                                                          | Absorption wavelength (nm) | Chemical structure                                                                   | Ref.   |
|-------------|-------------------------------------------------------------|----------------------------|--------------------------------------------------------------------------------------|--------|
| BODIPY-type | Boron dipyrromethene (BODIPY)                               | 665                        | 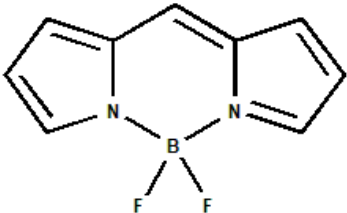  | [1, 2] |
|             | Chlorin e6 (Ce6)                                            | 670                        |   | [3]    |
| Chlorines   | (2-[1-hexyloxyethyl]-2-devinylpyropheophorbide-alpha (HPPH) | 665                        |  | [4]    |

|          |                                           |     |                                                                                      |     |
|----------|-------------------------------------------|-----|--------------------------------------------------------------------------------------|-----|
|          | IR820 dye                                 | 819 | 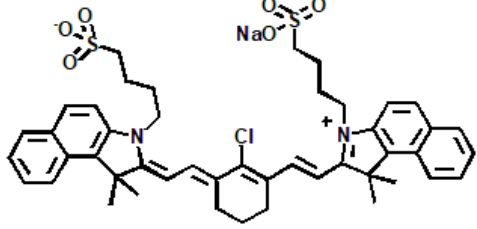  | [5] |
| Cyanines | Merocyanin 540 (MC 540)                   | 540 |   | [6] |
|          | Indocyanine green (ICG)                   | 780 |   | [7] |
| Dye-type | Methylene blue succinimidyl ester (MB-SE) | 666 |  | [8] |

|                             |                                  |     |                                                                                      |      |
|-----------------------------|----------------------------------|-----|--------------------------------------------------------------------------------------|------|
| Herbal extracts             | Pheophorbide A<br>(PheoA)        | 667 | 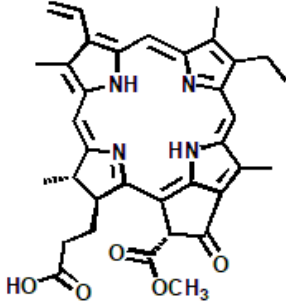  | [9]  |
| Metalphthalocyanines        | Zinc<br>phthalocyanine<br>(ZnPc) | 674 |   | [10] |
| Nanostructured metal oxides | TiO <sub>2</sub> NPs             | 423 |   | [11] |
| Porphyrins                  | Protoporphyrin IX (PpIX)         | 635 |  | [12] |

---

Benzoporphyrin  
derivative  
monoacid (BPD)

690

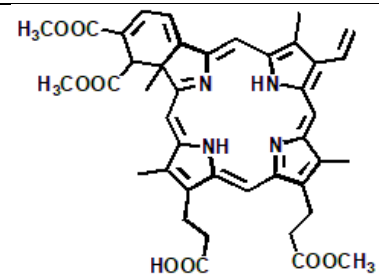

[13]

5,10,15,20-  
tetrakis(4-  
hydroxyphenyl)-  
21H,23H-  
porphyrin (tHPP)

420

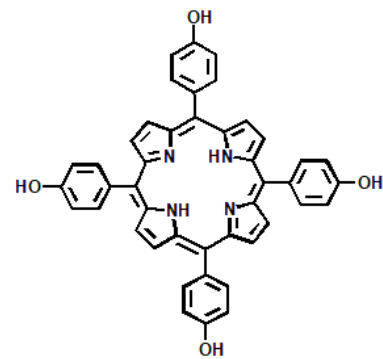

[14]

Purpurin-18

699

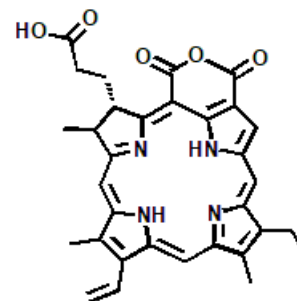

[15]

---

|           |                                                         |     |                                                                                      |          |
|-----------|---------------------------------------------------------|-----|--------------------------------------------------------------------------------------|----------|
|           |                                                         |     | 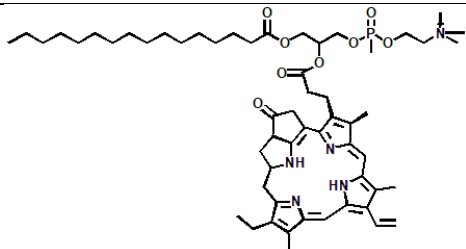  |          |
|           | Pyrolipid                                               | 665 |                                                                                      | [16]     |
|           | Meso-tetra-(4-N,N,N-trimethylanilinium)-porphine (TMAP) | 630 |   | [17, 18] |
| Xanthenes | Rose bengal (RB)                                        | 562 |  | [19]     |
